# Supplementary material for: Promiscuous stabilisation behaviour of silicic acid by cationic macromolecules: the case of phosphonium-grafted dicationic ethylene oxide bolaamphiphiles
Source: Royal Society of Chemistry journal article supplement (doi:10.1039/c1ra00448d), 2011-11-16
Supplement: c1ra00448d.pdf [file c1ra00448d.pdf]

# Electronic Supplementary Information

For

Promiscuous Stabilisation Behaviour of Silicic Acid

by Cationic Macromolecules: the Case of

Phosphonium-Grafted Dicationic Ethylene Oxide

Bolaamphiphiles

By

*Konstantinos D. Demadis, Anna Tsistraki,*

*Adriana Popa, Gheorghe Ilia, Aurelia Visa*

## Contents

**(1) Mass Spectra**

**(2) FT-IR Spectra**

**(3) EDS Spectra**

**(4) UV-vis Spectra**

**(5) NMR Spectra**

**(6) Effect of PEG-200, PEG-1000, and PEG-4000 on silicic acid condensation.**

## Mass Spectra

### Mass spectrum product PEGP<sup>+</sup> 200

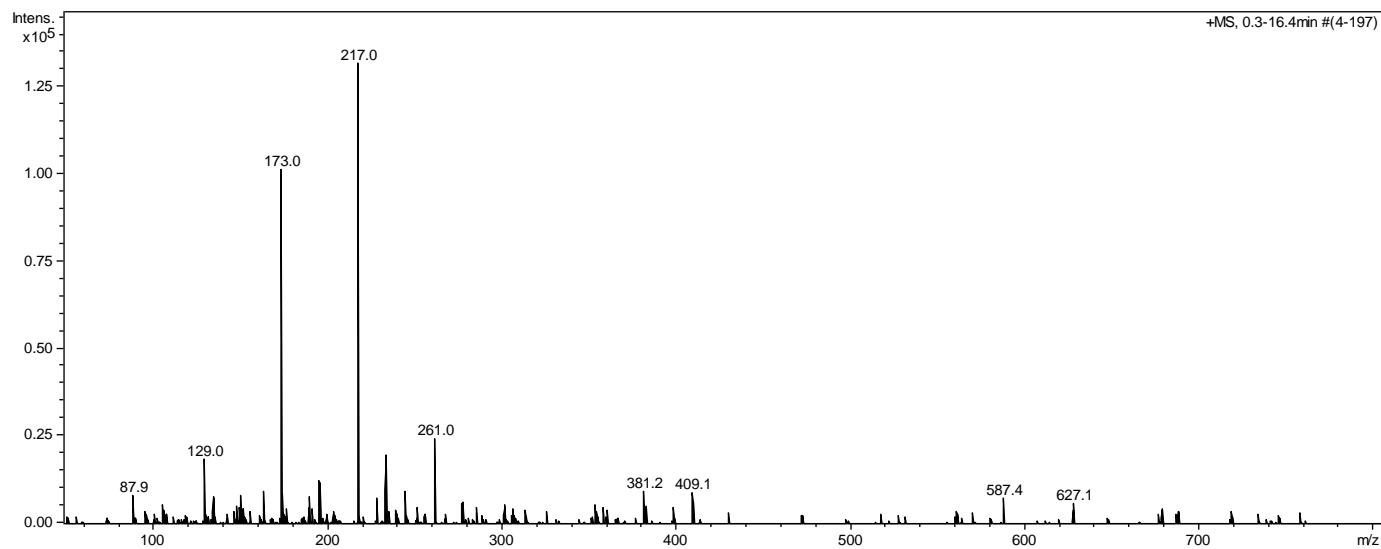

Figure S-1. PEGP<sup>+</sup> 200, MS+: 50-800 m/z

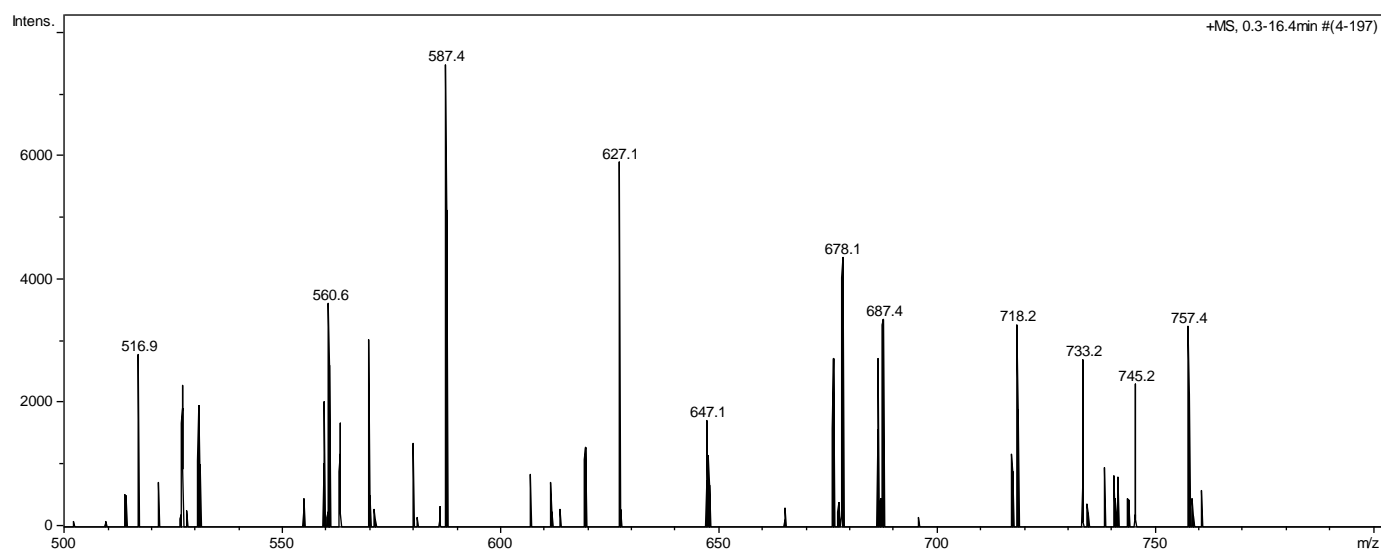

Figure S-2. PEGP<sup>+</sup> 200, MS+: 500-800 m/z

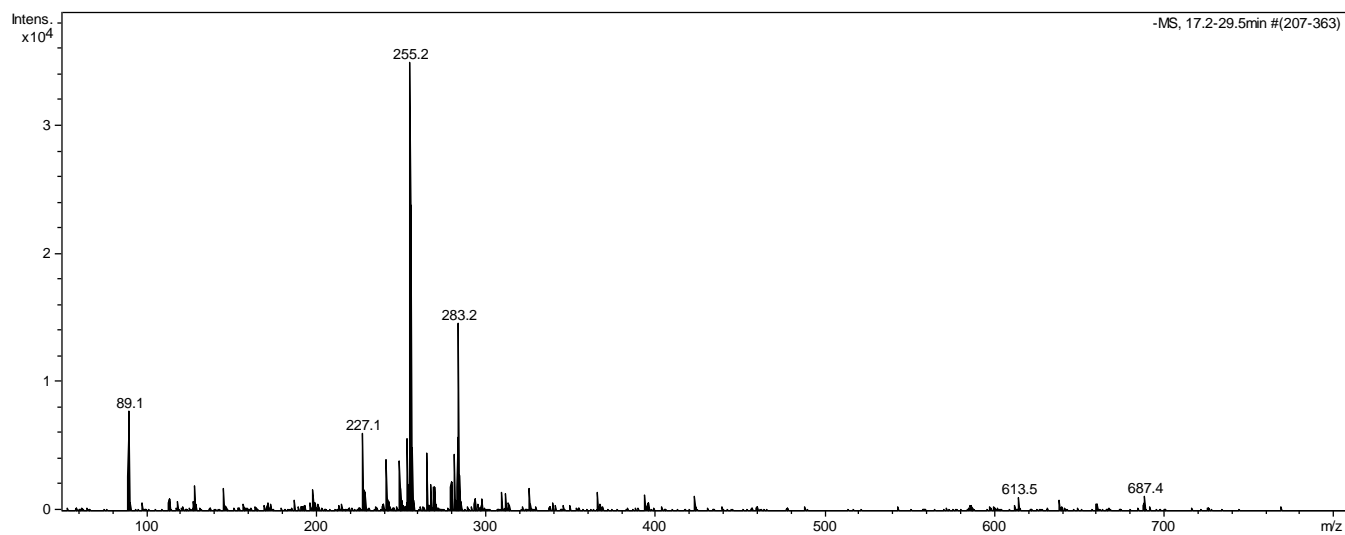

Figure S-3. PEGP<sup>+</sup> 200, MS-: 50-800 m/z

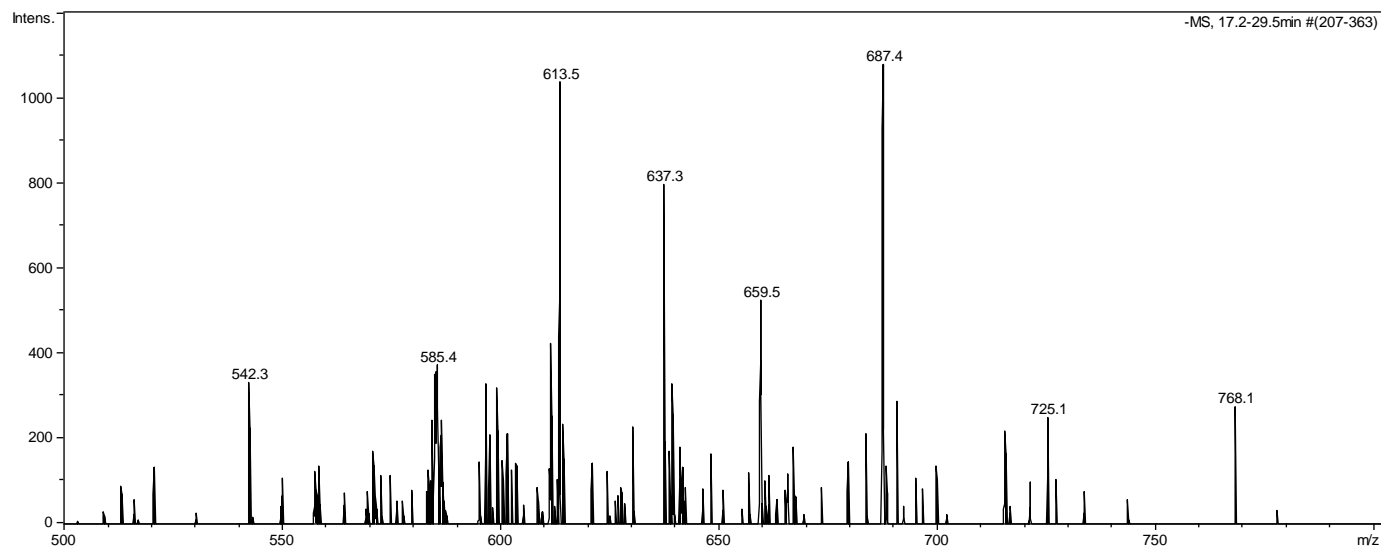

Figure S-4. PEGP<sup>+</sup> 200, MS-: 500-800 m/z

**Mass spectrum product PEGP<sup>+</sup> 1000 (M=1364)**

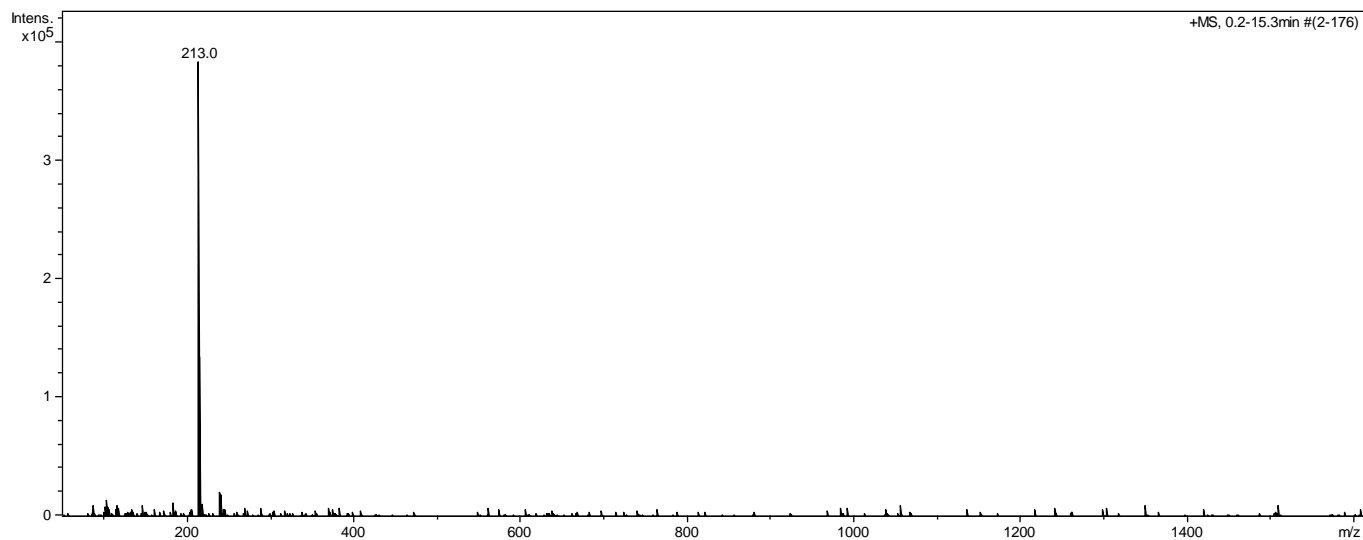

**Figure S-5. Mass spectrum PEGP<sup>+</sup> 1000, MS+: 50-1600 m/z**

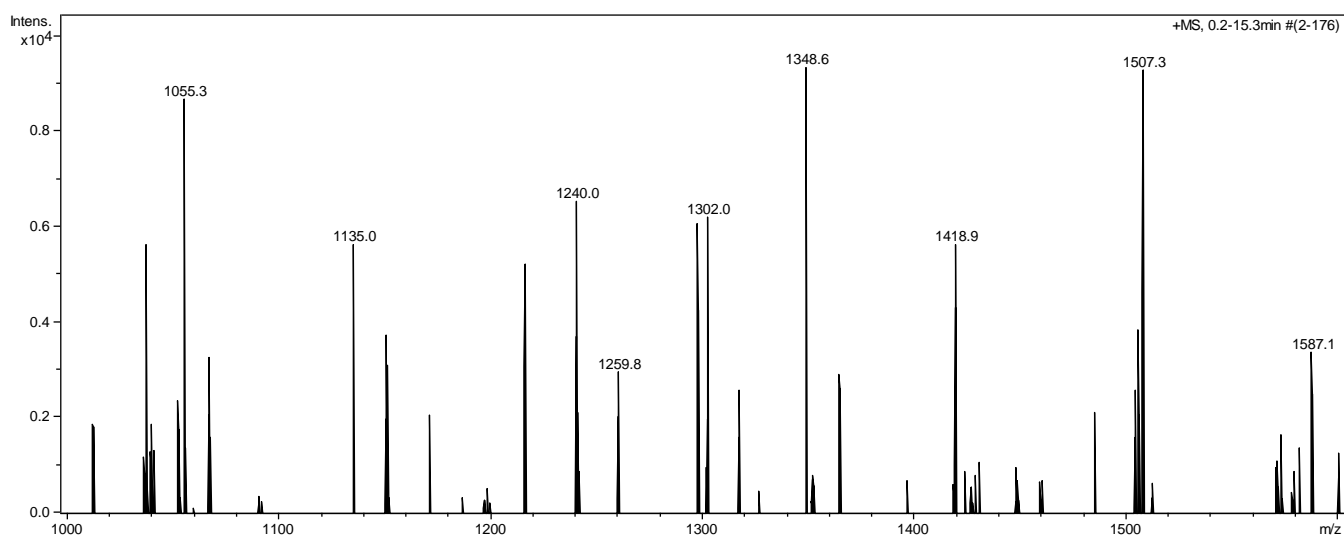

**Figure S-6. Mass spectrum PEGP<sup>+</sup> 1000, MS+: 1000-1600 m/z**

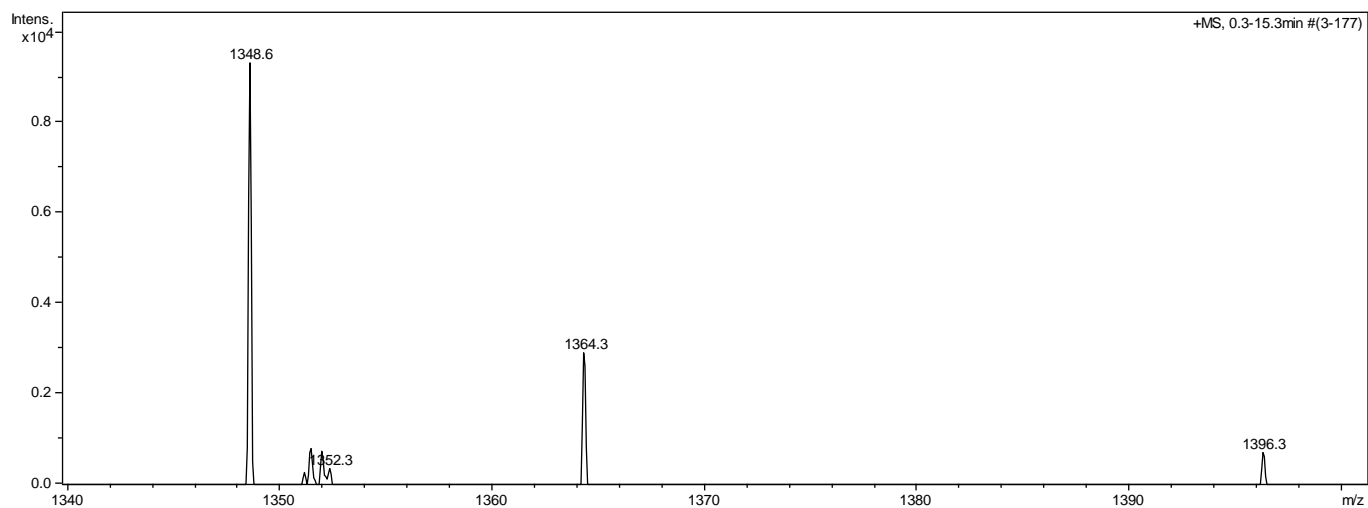

Figure S-7. Mass spectrum PEGP<sup>+</sup> 1000, MS<sup>+</sup>: 1340-1400 m/z

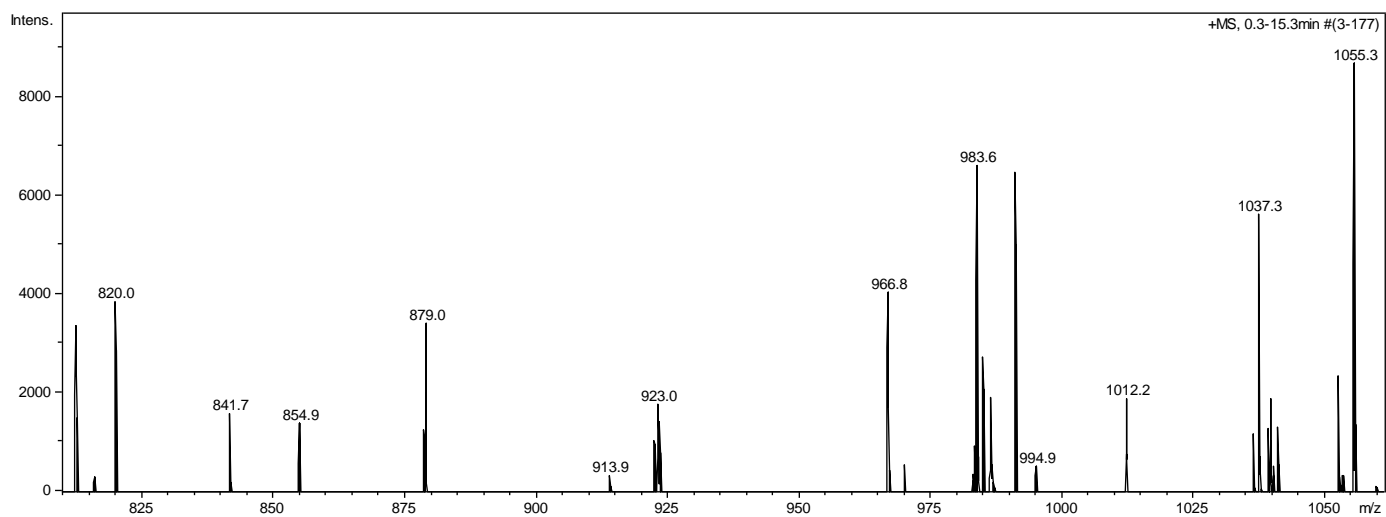

Fig. S-8. Mass spectrum PEGP<sup>+</sup> 1000, MS<sup>+</sup>: 810-1060 m/z

**Mass spectrum product PEGP<sup>+</sup> 4000**

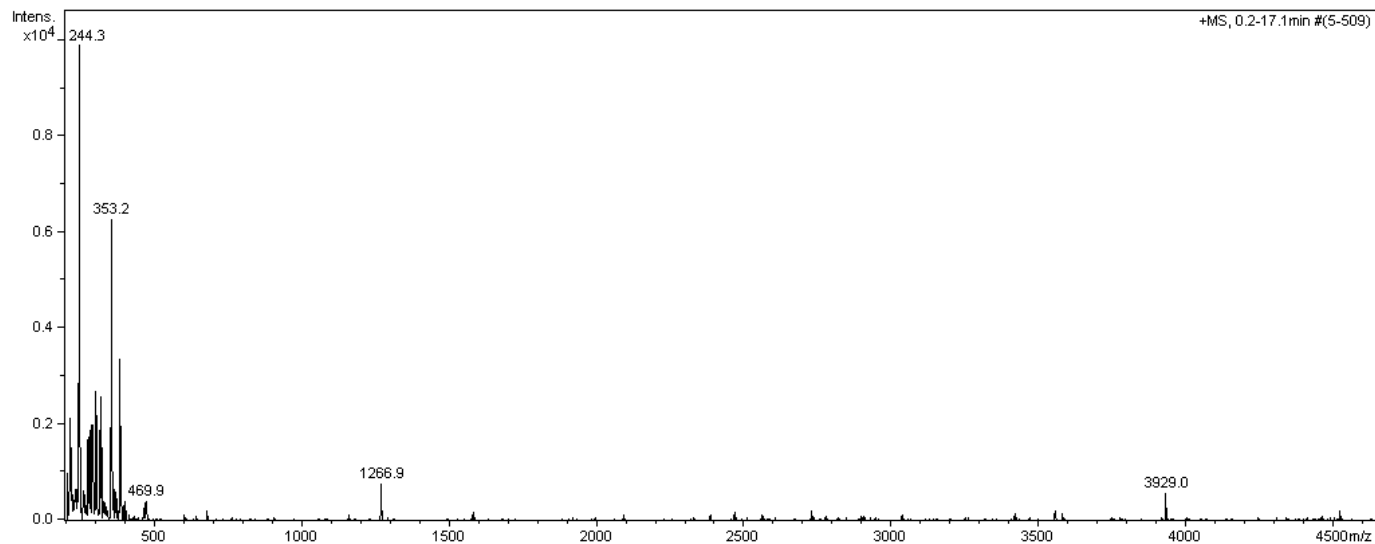

**Figure S-9. PEGP<sup>+</sup> 4000, MS+: 200-4600 m/z**

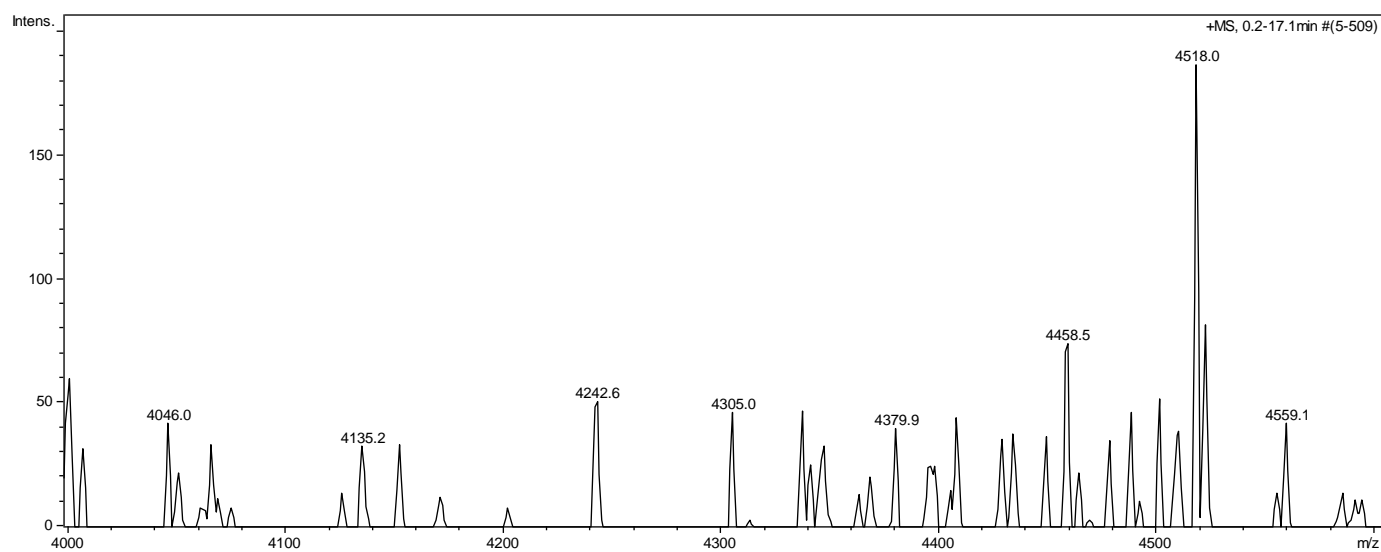

**Figure S-10. PEGP<sup>+</sup> 4000, MS+: 4000-4600 m/z**

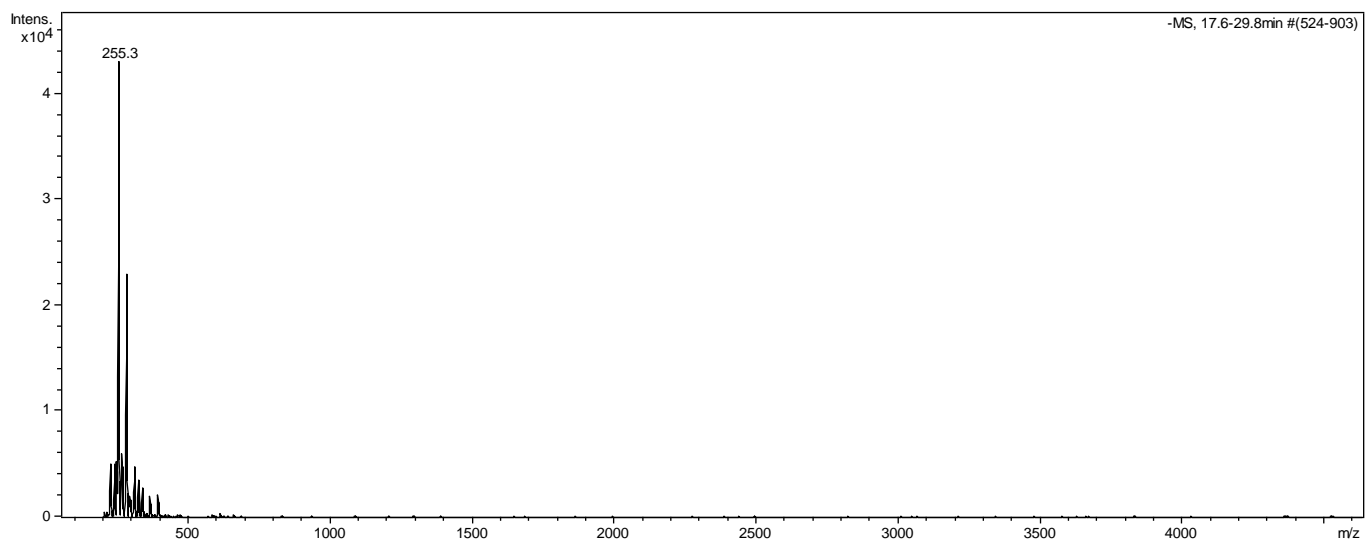

Figure S-11. PEGP<sup>+</sup> 4000, MS-: 200-4600 m/z

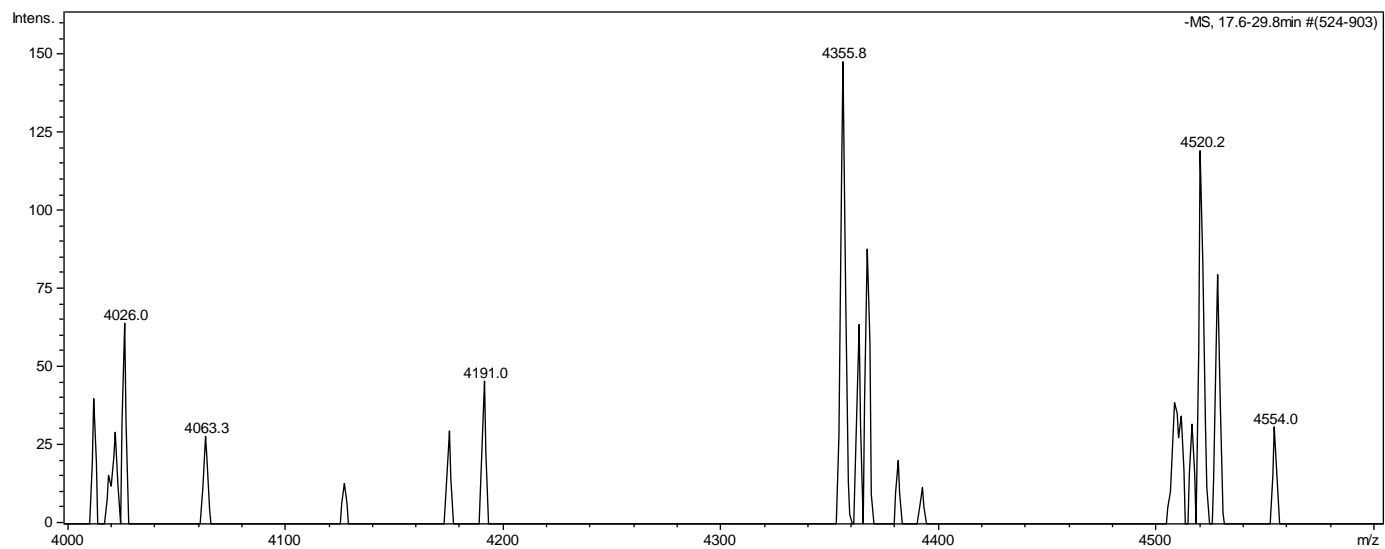

Figure S-12. PEGP<sup>+</sup> 4000, MS-: 4000-4600 m/z



## FT-IR Spectra

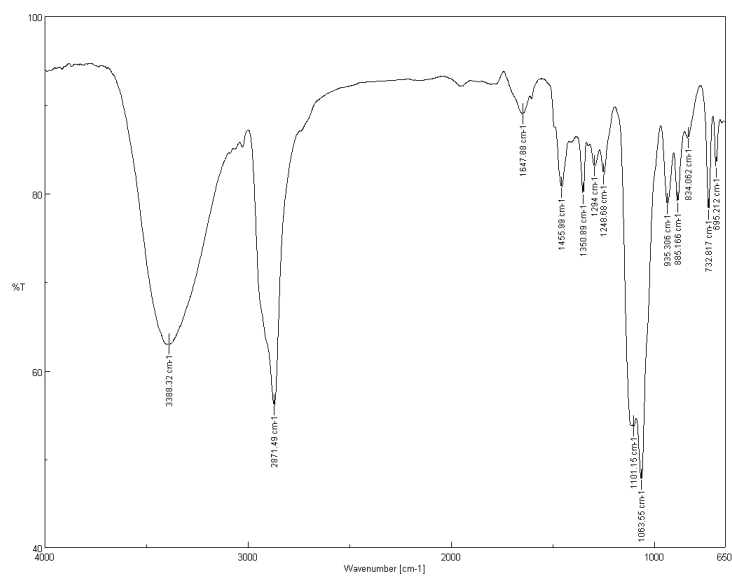

Figure S-13. FT-IR spectrum of PEGP<sup>+</sup>-200.

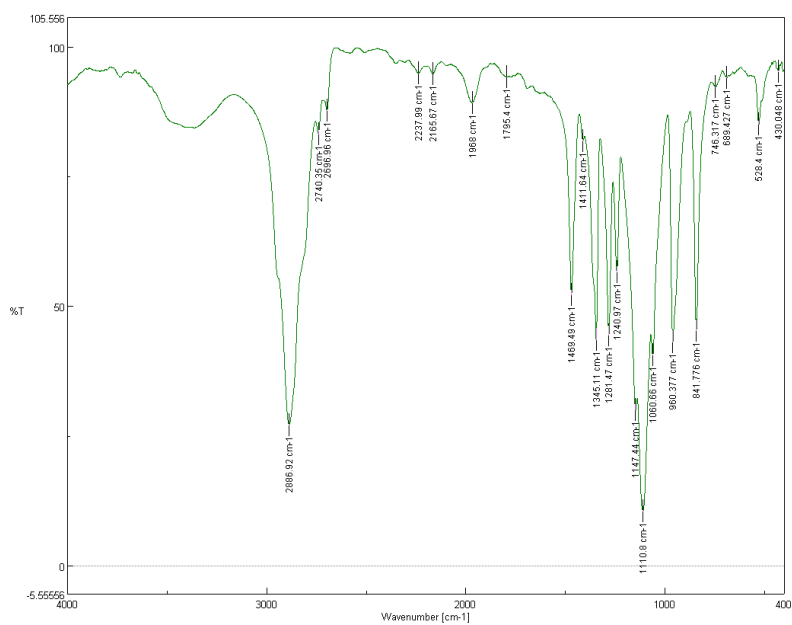

Figure S-14. FT-IR spectrum of PEGP<sup>+</sup>-1000.

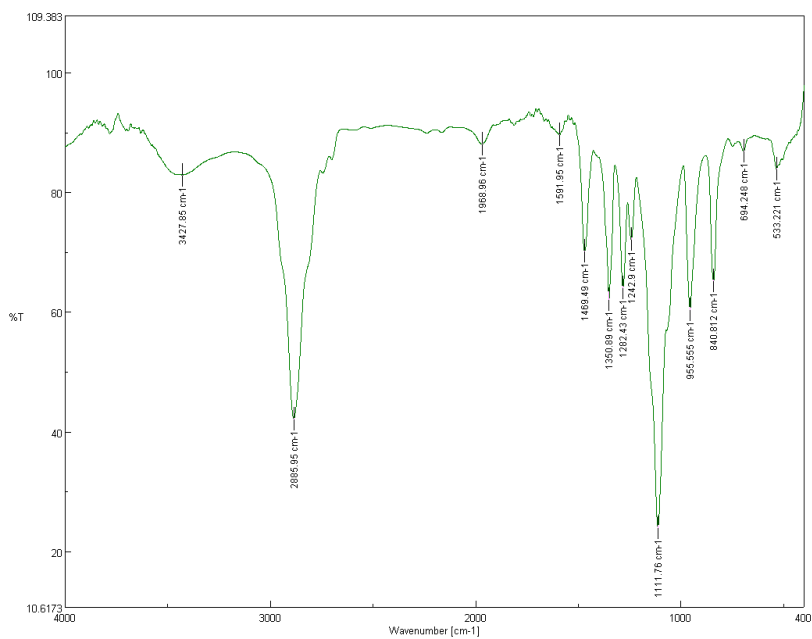

**Figure S-15.** FT-IR spectrum of PEGP<sup>+</sup>-4000.

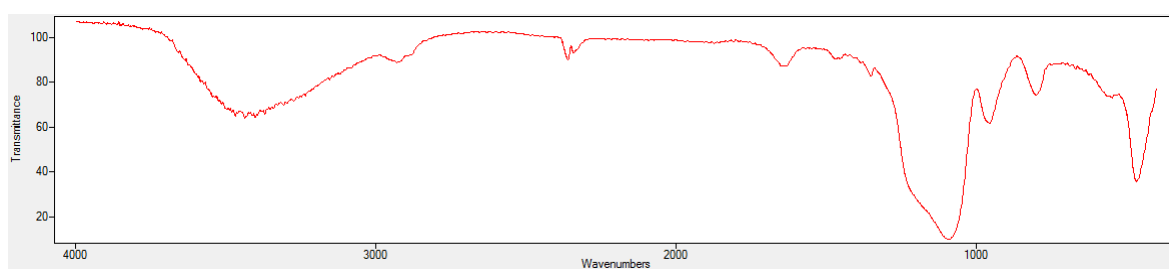

**Figure S-16.** FT-IR spectrum of silica precipitated from "control" experiments.

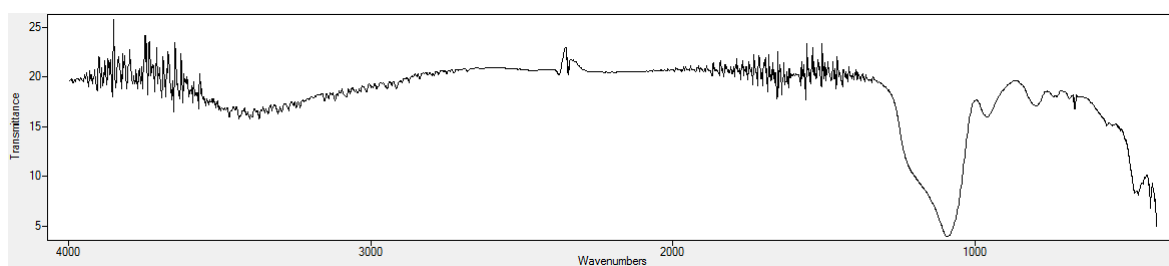

**Figure S-17.** FT-IR spectrum of silica precipitated from silicic acid condensation experiments in the presence of 150 ppm PEGP<sup>+</sup>-1000.

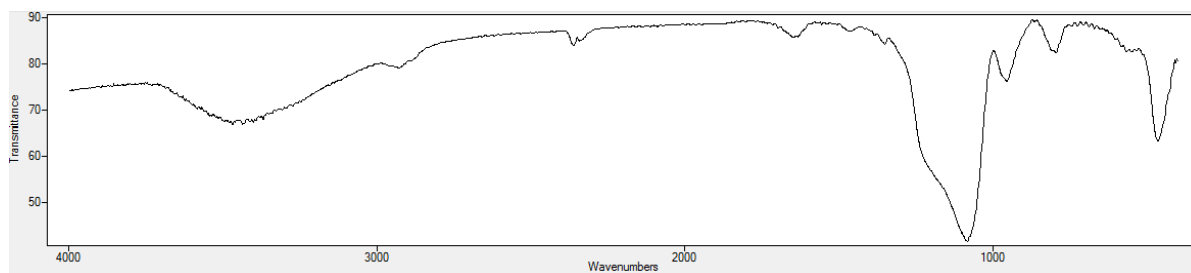

**Figure S-18.** FT-IR spectrum of silica precipitated from silicic acid condensation experiments in the presence of 150 ppm PEGP<sup>+</sup>-4000.

### EDS Spectra

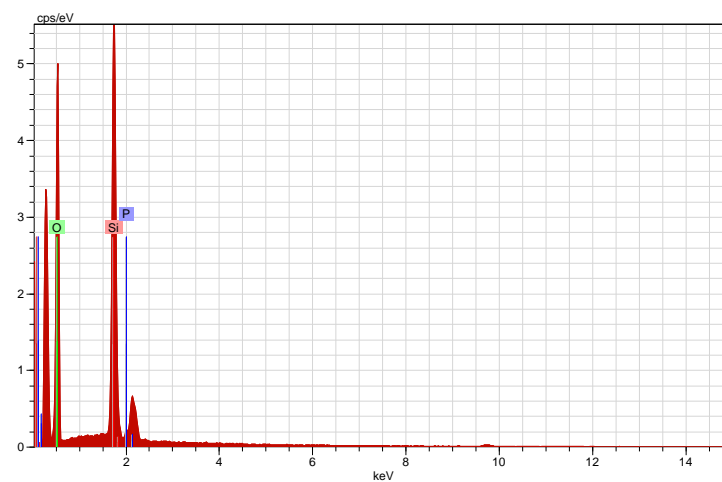

Spectrum: Acquisition

| El | AN | Series | unn. C  | norm. C | Atom. C | Error |
|----|----|--------|---------|---------|---------|-------|
|    |    |        | [wt.-%] | [wt.-%] | [at.-%] | [%]   |

|    |    |          |       |       |       |     |
|----|----|----------|-------|-------|-------|-----|
| Si | 14 | K-series | 16.46 | 16.46 | 10.26 | 0.7 |
| P  | 15 | K-series | 3.23  | 3.23  | 1.83  | 0.2 |
| O  | 8  | K-series | 80.31 | 80.31 | 87.91 | 1.7 |

-----  
Total: 100.00 100.00 100.00

**Figure S-19.** EDS spectrum of silica precipitates in the presence of 150 ppm of PEGP<sup>+</sup>-1000.

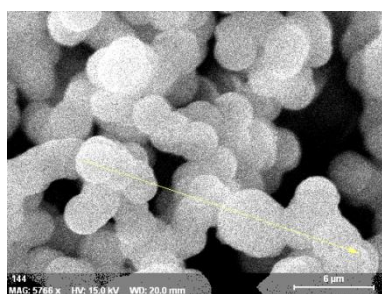

Image size: 512 x 384

Mag: 5766 x

HV: 15.0 kV

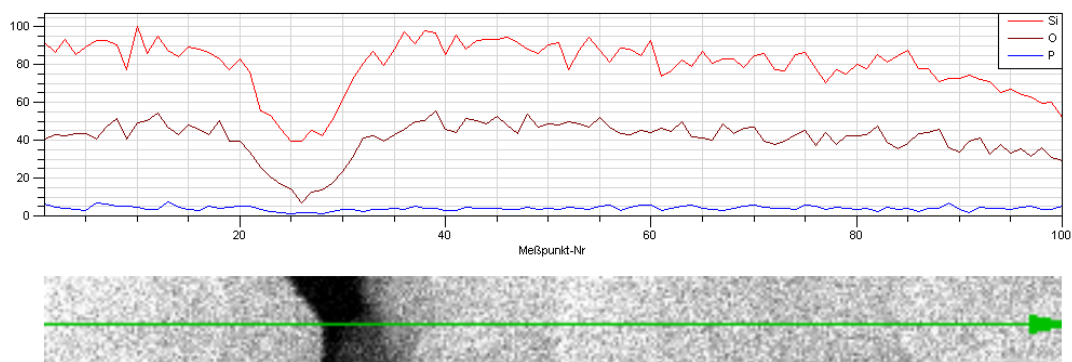

Line scan

Measure time: 1:40 min

Start: (103,201) End: (477,326)

Length: 22  $\mu\text{m}$

**Figure S-20.** Line spectrum of silica precipitates in the presence of 150 ppm of PEGP<sup>+</sup>-1000.

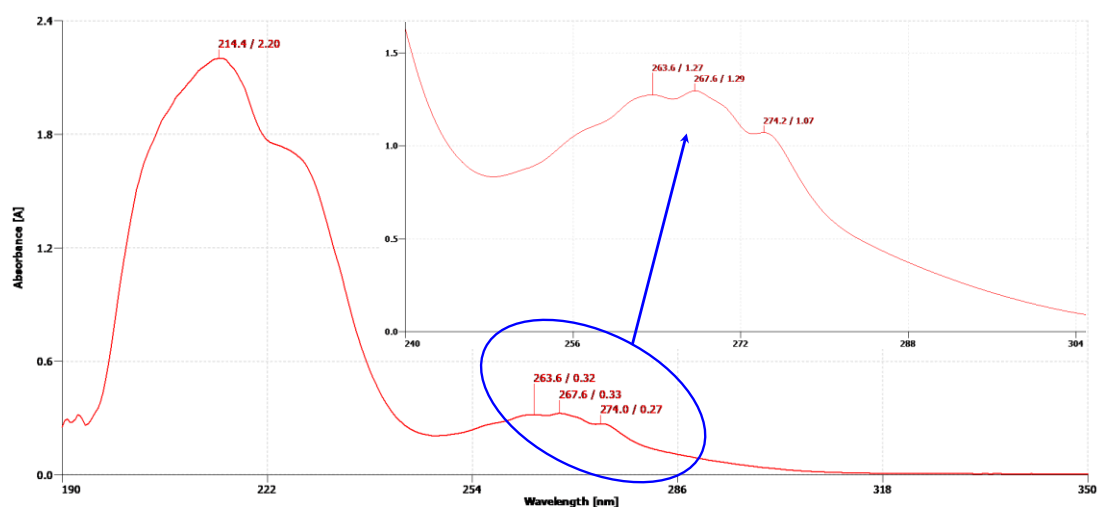

**Figure S-21.** UV-vis spectrum of product PEGP<sup>+</sup>-200.

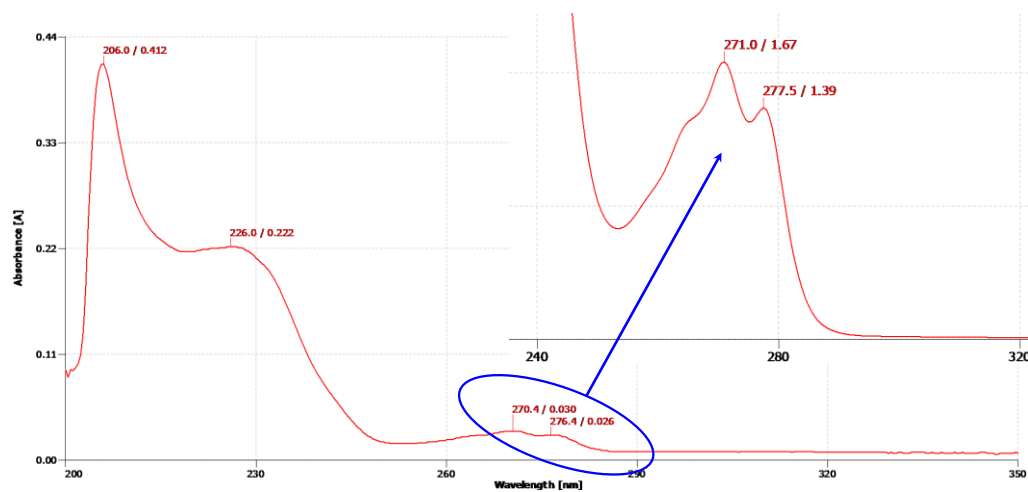

Figure S-22. UV-vis spectrum of product PEGP<sup>+</sup>-1000.

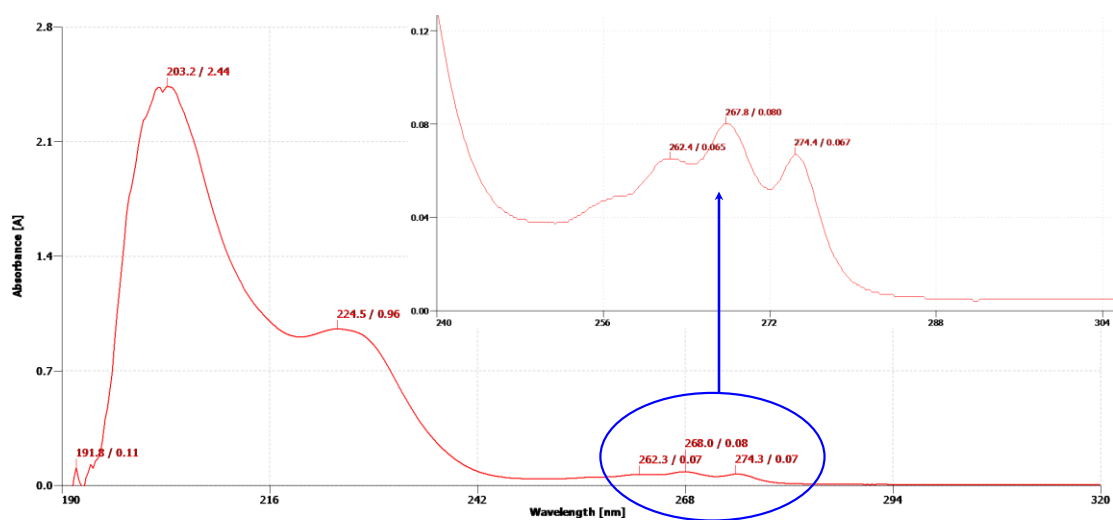

Figure S-23. UV-vis spectrum of product PEGP<sup>+</sup>-4000.

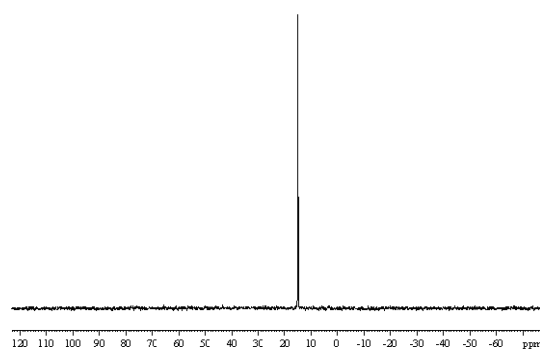

Figure S-24. <sup>31</sup>P NMR spectra of PEGP<sup>+</sup>-1000 (162MHz, CDCl<sub>3</sub>, δ: 14,593 ppm, s).

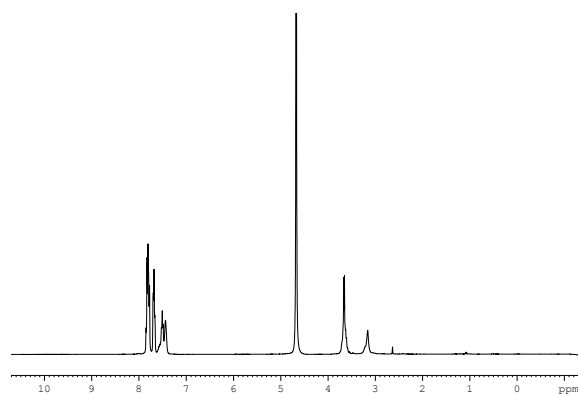

**Figure S-25.**  $^1\text{H}$  NMR spectra of  $\text{PEGP}^+-1000$  (400MHz,  $\text{CDCl}_3$ .  $\delta$ : 3.60 (s,  $-\text{CH}_2-$ ), 4, 67(-  
 $\text{CH}=\text{CH}_2$ ), 8,00-7,20 (m,  $-\text{C}_6\text{H}_5$ )).
